# Supplementary material for: Development and validation of green chromatography for the determination of anthocyanins in haskap berry, mulberry and blackberry
Source: Royal Society of Chemistry journal article supplement (doi:10.1039/c7ay00229g), 2017-01-01
Supplement: c7ay00229g1.pdf [file c7ay00229g1.pdf]

## Supplementary materials

Development and validation of a green chromatography for the determination of anthocyanins in haskap berry, mulberry and blackberry

Jun Sang, Qun Ma, Cui-qin Li\*

*Key Laboratory of the Ministry of Education for Medicinal Resources and Natural Pharmaceutical Chemistry, National Engineering Laboratory*

*College of Life Sciences, Shaanxi Normal University, Xi'an, Shaanxi 710062, China*

**Supplementary Table 1** Mobile phases of liquid chromatography for analysing anthocyanins from various samples in literatures.

| Samples | Mobile phase composition | Reference <sup>a</sup> |
|---------|--------------------------|------------------------|
|---------|--------------------------|------------------------|

\* Corresponding author. Tel.: +86 29 85310266; fax: +86 29 85310546.

E-mail address: [licuiqin16@snnu.edu.cn](mailto:licuiqin16@snnu.edu.cn) (C.-Q. Li)

|                                 | A phase (v/v)                                    | B phase (v/v)                                               |    |
|---------------------------------|--------------------------------------------------|-------------------------------------------------------------|----|
| Grape skin                      | 10% formic acid in water                         | 10% formic acid in methanol                                 | 24 |
| Grape seed and skin             | 0.2% TFA in water                                | 0.2% TFA in acetonitrile                                    | 25 |
| Lotus petal                     | TFA/formic acid/water<br>(0.1 : 2 : 97.9)        | TFA/formic acid/acetonitrile/water<br>(0.1 : 2 : 35 : 62.9) | 26 |
| Sweet cherry                    | 0.1% TFA in water                                | 0.1% TFA in methanol                                        | 27 |
| Andean potato                   | 4.5% formic acid in water                        | acetonitrile                                                | 28 |
| Red cabbage                     | 4.5% formic acid in water                        | acetonitrile                                                | 29 |
| Aronia melanocarpa              | 0.5% TFA in water                                | 0.5% TFA in acetonitrile                                    | 30 |
| <i>Lycium ruthenicum</i> Murray | 5% formic acid in water                          | acetonitrile                                                | 31 |
| Purple sweet potato             | 0.5% TFA in water                                | acetonitrile                                                | 32 |
| Blueberry                       | Formic acid/water/ acetonitrile<br>(10 : 87 : 3) | Formic acid/water/ acetonitrile<br>(10 : 40 : 50)           | 17 |
| Purple tomato                   | 5% formic acid in water                          | Formic acid/acetonitrile/water<br>(5 : 47.5 : 47.5)         | 33 |

<sup>a</sup> References are as follows:

- 24 M. O. Downey and S. Rochfort, Simultaneous separation by reversed-phase high-performance liquid chromatography and mass spectral identification of anthocyanins and flavonols in Shiraz grape skin, *J. Chromatogr. A*, 2008, **1201**, 43-47.
- 25 S. Munoz, M. Mestres, O. Busto and J. Guasch, Determination of some flavan-3-ols and anthocyanins in red grape seed and skin extracts by HPLC-DAD: Validation study and response comparison of different standards, *Anal. Chim. Acta*, 2008, **628**, 104-110.
- 26 Z. Yang, X. Wei, F. Gao, L. Wang, H. Zhang, Y. Xu, L. Li, Y. Ge, J. Zhang and J. Zhang, Simultaneous analysis of anthocyanins and flavonols in petals of lotus (*Nelumbo*) cultivars by high-performance liquid chromatography-photodiode array detection/electrospray ionization mass spectrometry, *J. Chromatogr. A*, 2009, **1216**, 106-112.
- 27 C. G. Grigorasa, D. Destandau, S. Zubrzycki and C. Elfakir, Sweet cherries anthocyanins: An environmental friendly extraction and purification method, *Sep. Purif. Technol.*, 2012, **100**, 51-58.
- 28 M. M. Giusti, M. F. Polit, H. Ayvaz, D. Tay and I. Manrique, Characterization and quantitation of anthocyanins and other phenolics in native Andean Potatoes, *J. Agric. Food Chem.*, 2014, **62**, 4408-4416.
- 29 N. Ahmadiani, R. J. Robbins, T. M. Collins and M. M. Giusti, Anthocyanins Contents, Profiles, and Color Characteristics of Red Cabbage Extracts from Different Cultivars and Maturity Stages, *J. Agric. Food Chem.*, 2014, **62**, 7524-7531.
- 30 H. Wangensteen, M. Braunlich, V. Nikolic, K. E. Malterud, R. Slimestad and H. Barsett, Anthocyanins, proanthocyanidins and total phenolics in four cultivars of aronia: Antioxidant and enzyme inhibitory effects, *J. Funct. Foods*, 2014, **7**, 746-752.
- 31 H. Jin, Y. Liu, F. Yang, J. Wang, D. Fu, X. Zhang, X. Peng and X. Liang, Characterization of anthocyanins in wild *Lycium ruthenicum* Murray by HPLC-DAD/QTOF-MS/MS, *Anal. Methods*, 2015, **7**, 4947-4956.
- 32 Y. Hu, L. Deng, J. Chen, S. Zhou, S. Liu, Y. Fu, C. Yang, Z. Liao and M. Chen, An analytical pipeline to compare and characterise the anthocyanin antioxidant activities of purple sweet potato cultivars, *Food Chem.*, 2016, **194**, 46-54.
- 33 X. Su, J. Xu, D. Rhodes, Y. Shen, W. Song, B. Katz, J. Tomich, W. Wang, Identification and quantification of anthocyanins in transgenic purple tomato, *Food Chem.*, 2016, **202**, 184-188.

**Supplementary Table 2** The original data of the determination of intra- and inter-day precision, repeatability, stability and recovery of cyanidin-3-*O*-glucoside in haskap berry, mulberry and blackberry. <sup>a</sup>

| Samples                   | Precision <sup>b</sup> |                     | Repeatability <sup>b</sup> | Stability <sup>b</sup> | Recovery                           |                                                       | Mixture solution <sup>b</sup> |
|---------------------------|------------------------|---------------------|----------------------------|------------------------|------------------------------------|-------------------------------------------------------|-------------------------------|
|                           | Intra-day precision    | Inter-day precision |                            |                        | Berry sample solution <sup>b</sup> | Cyanidin-3- <i>O</i> -glucoside solution <sup>c</sup> |                               |
| Haskap berry <sup>d</sup> | 22064.2                | 22084.8             | 22064.2<br>21796.9         | 22064.2<br>22170.9     | 11261.2                            | 3566.7                                                | 13535.4                       |
|                           | 22133.4                | 21802.0             | 22258.3<br>22300.9         | 21952.5<br>21968.0     |                                    |                                                       | 13401.1                       |
|                           | 21770.6                | 22091.7             | 22271.6<br>22276.5         | 22301.9<br>21816.3     |                                    |                                                       | 13458.6                       |
|                           | 15189.8                | 15263.3             | 15189.8<br>15495.9         | 15189.8<br>15432.6     |                                    |                                                       | 7998.4                        |
| 14995.9                   | 15336.0                | 15581.4<br>14869.4  | 14896.7<br>15603.1         | 8898.1                 |                                    |                                                       |                               |
| 15620.4                   | 14996.1                | 14909.5<br>15446.8  | 15068.4<br>15001.2         | 8912.9                 |                                    |                                                       |                               |
| 2241.5                    | 2261.9                 | 2241.5<br>2245.3    | 2241.5<br>2232.9           | 2025.5                 | 3566.7                             | 3469.0                                                |                               |
| 2243.4                    | 2244.5                 | 2171.6<br>2255.9    | 2262.0<br>2183.3           |                        |                                    | 3461.7                                                |                               |
| 2250.8                    | 2260.7                 | 2328.2<br>2300.7    | 2261.9<br>2227.5           |                        |                                    | 3422.4                                                |                               |
|                           |                        |                     |                            |                        |                                    |                                                       |                               |

<sup>a</sup> The data are the values of peak area, and the precision, repeatability and stability were directly evaluated by the peak area of analyte.

<sup>b</sup> The injection volume is 5  $\mu$ L for HPLC analysis.

<sup>c</sup> The injection volume is 1  $\mu$ L for HPLC analysis.

<sup>d</sup> Means 200  $\mu$ L of cyanidin-3-*O*-glucoside solution was added into 400  $\mu$ L of berry sample solution for recovery determination.

<sup>e</sup> Means 50  $\mu$ L of cyanidin-3-*O*-glucoside solution was added into 500  $\mu$ L of berry sample solution for recovery determination.

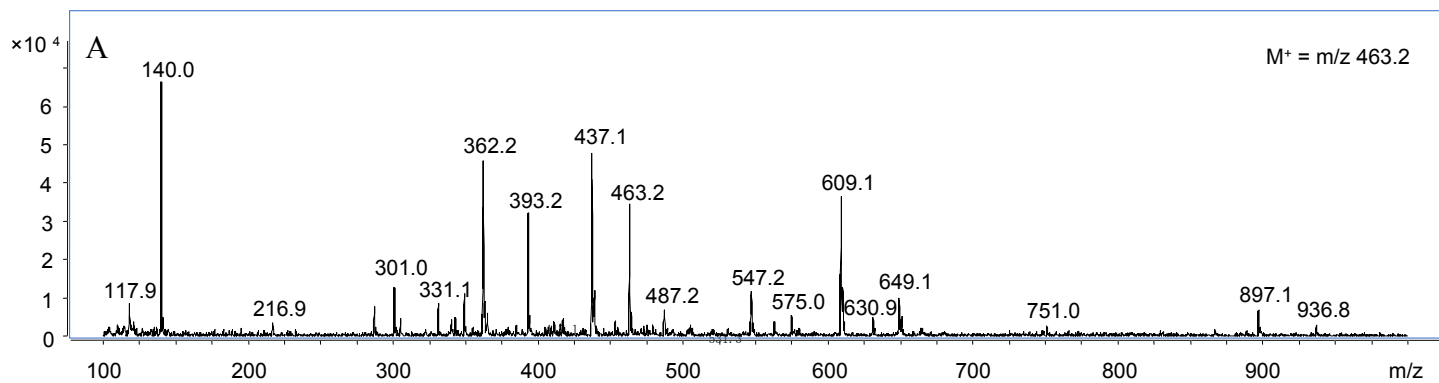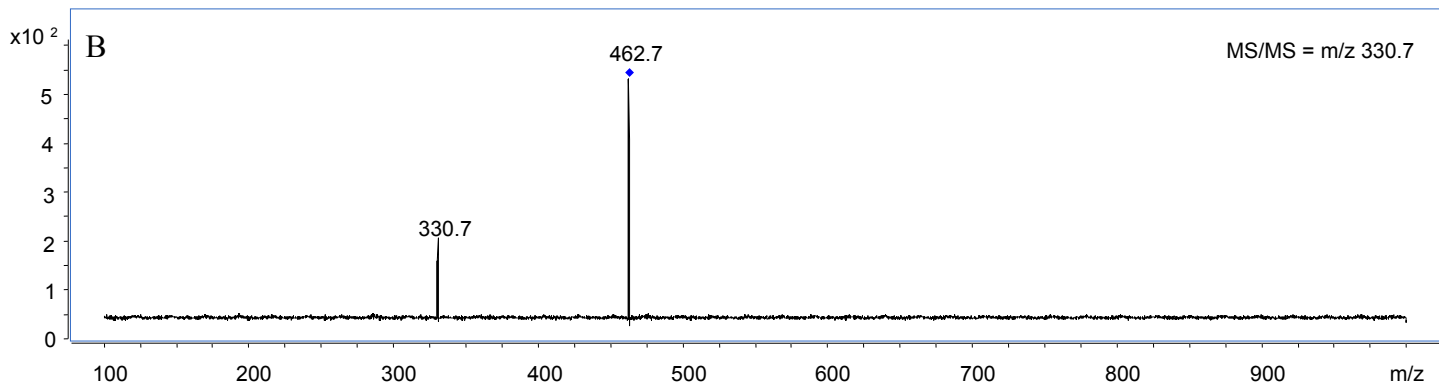

**Supplementary Fig. 1** Ms spectrum (A) and MS/MS spectrum (B) of anthocyanin 8.

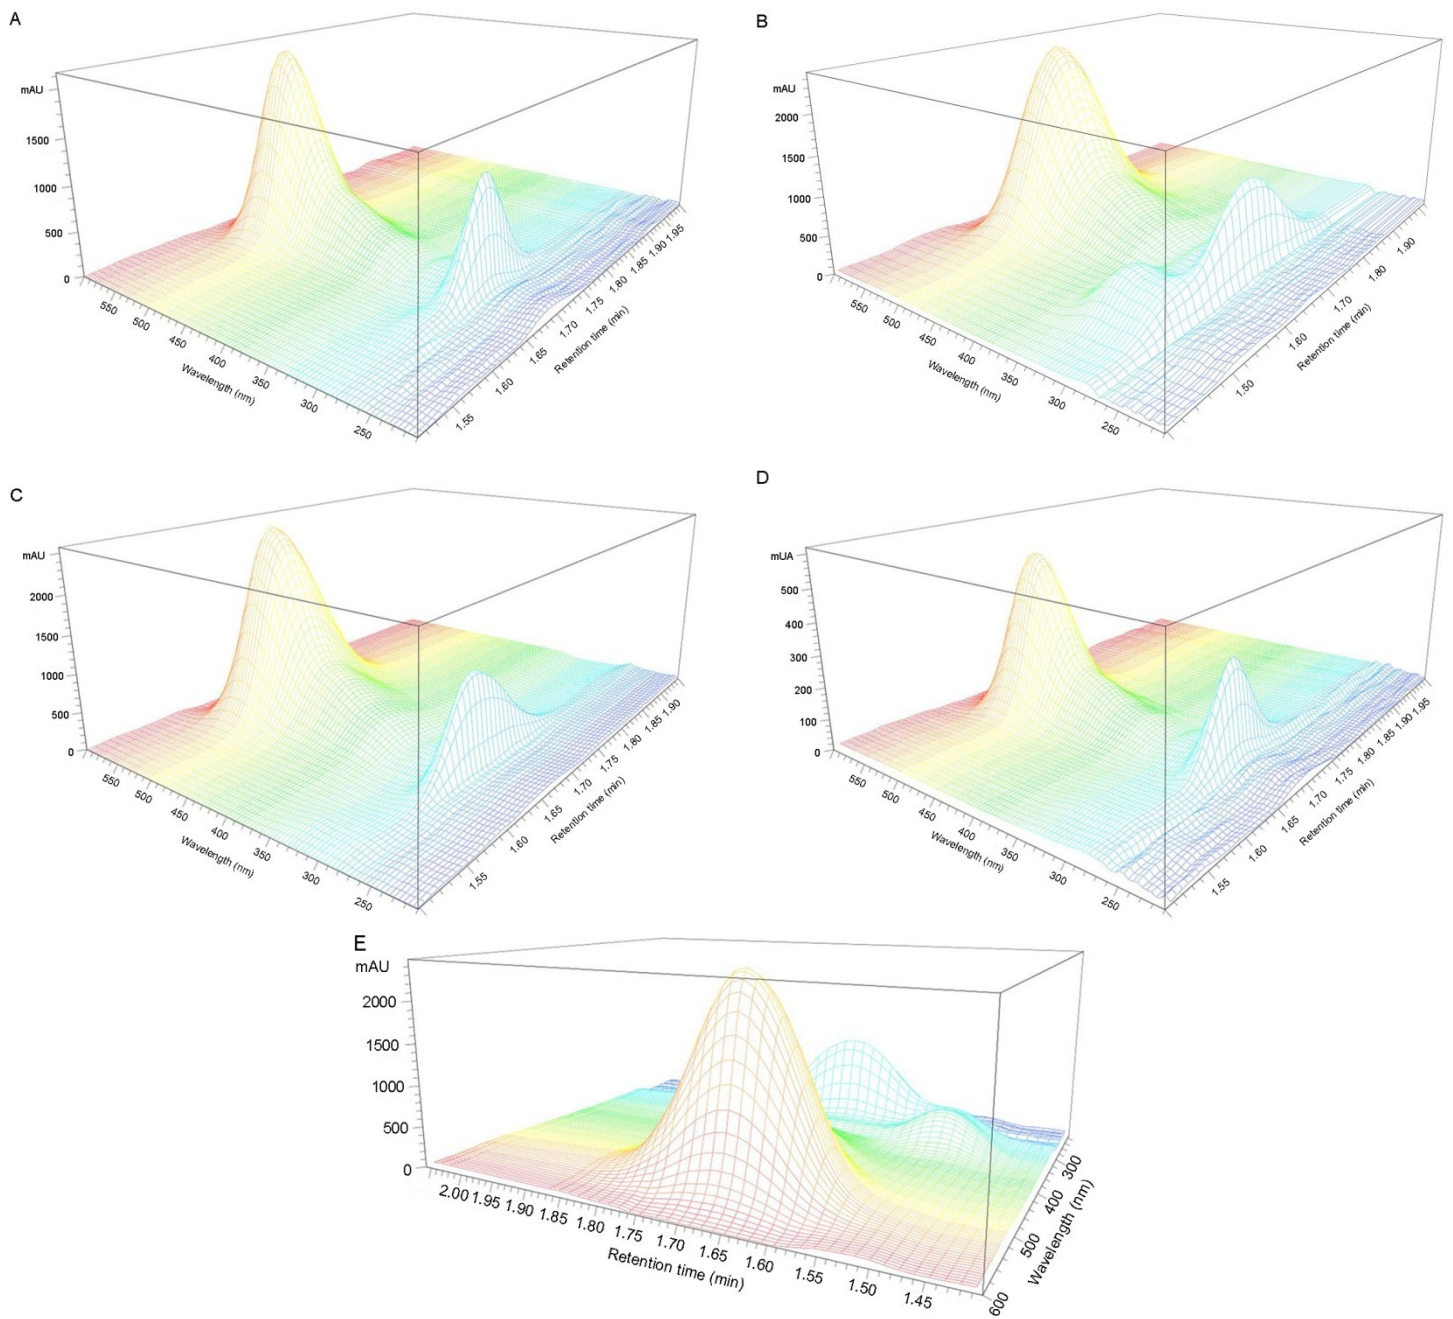

**Supplementary Fig. 2** Three-dimensional chromatograms of cyanidin-3-*O*-glucoside in standard solution (A), haskap berry sample (B and E), mulberry sample (C) and blackberry sample (D).

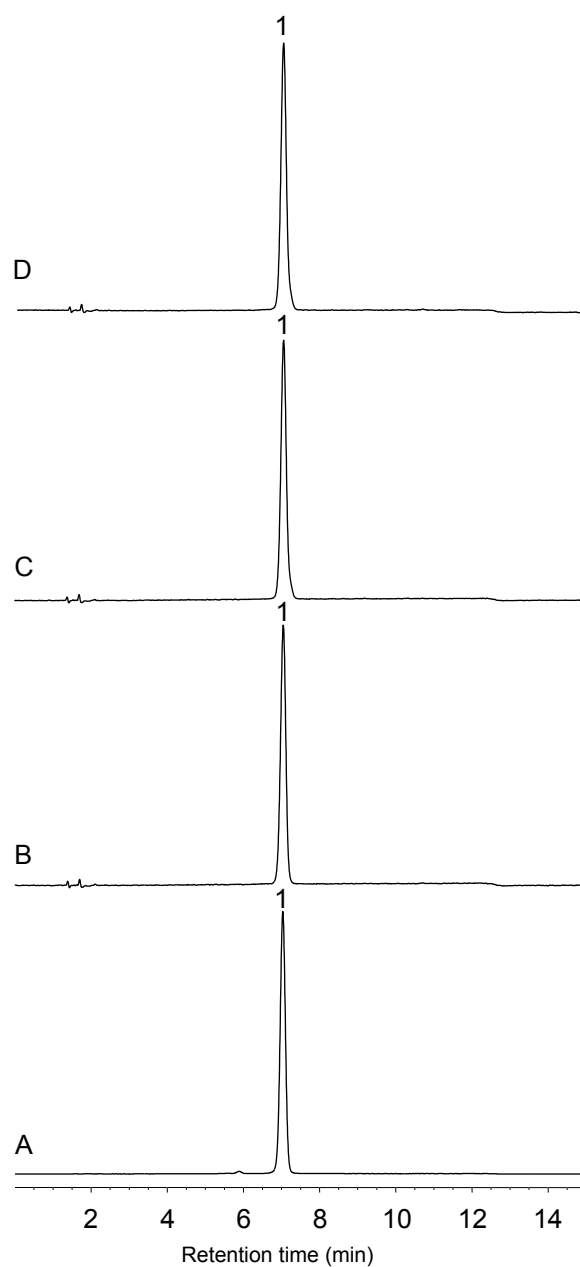

**Supplementary Fig. 3** The second-dimension HPLC chromatograms of cyanidin-3-*O*-glucoside (peak 1) from standard solution (A), blackberry sample (B), mulberry sample (C) and haskap berry sample (D). The chromatographic conditions were as follows: the analysis column was a ZORBAX Eclipse Plus C18 column (150 mm × 4.5 mm, 5 μm particle, Agilent Technologies Co., Ltd., USA); the mobile phase consisted of a trifluoroacetic acid aqueous solution (0.1%, v/v) and acetonitrile; gradient elution program was 10-25% of acetonitrile from 0 to 15 min; and the other parameters were same as the developed method.

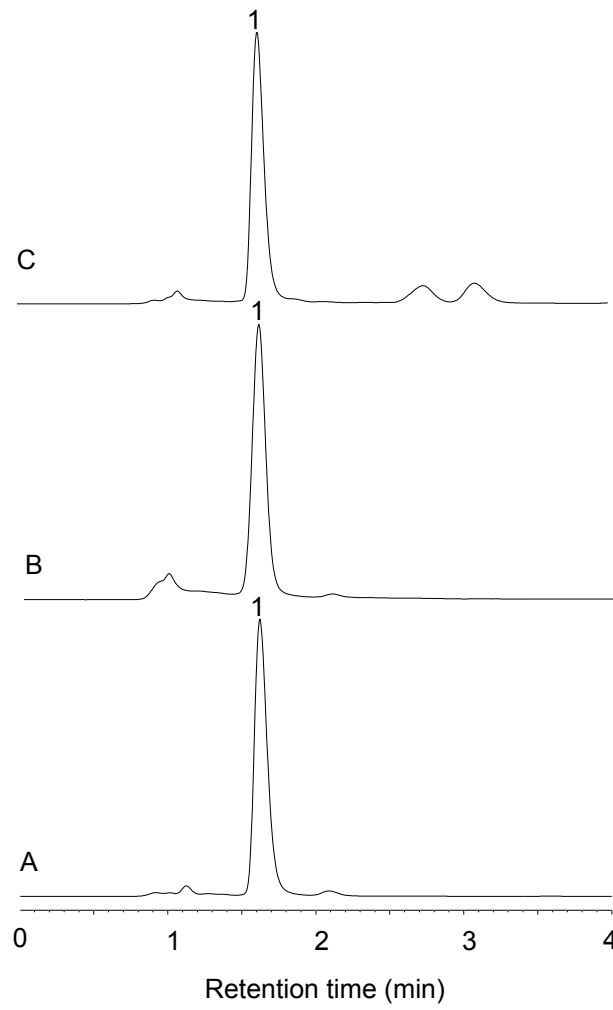

**Supplementary Fig. 4** HPLC chromatograms of recovery determination of cyanidin-3-*O*-glucoside (peak 1) from haskap berry sample (A), mulberry sample (B) and blackberry sample (C).
